# Supplementary material for: Shoulder mobility and strength impairments in patients with rotator cuff related shoulder pain: a systematic review and meta analysis
Source: PeerJ journal article supplement (doi:10.7717/peerj.17604), 2024-06-26

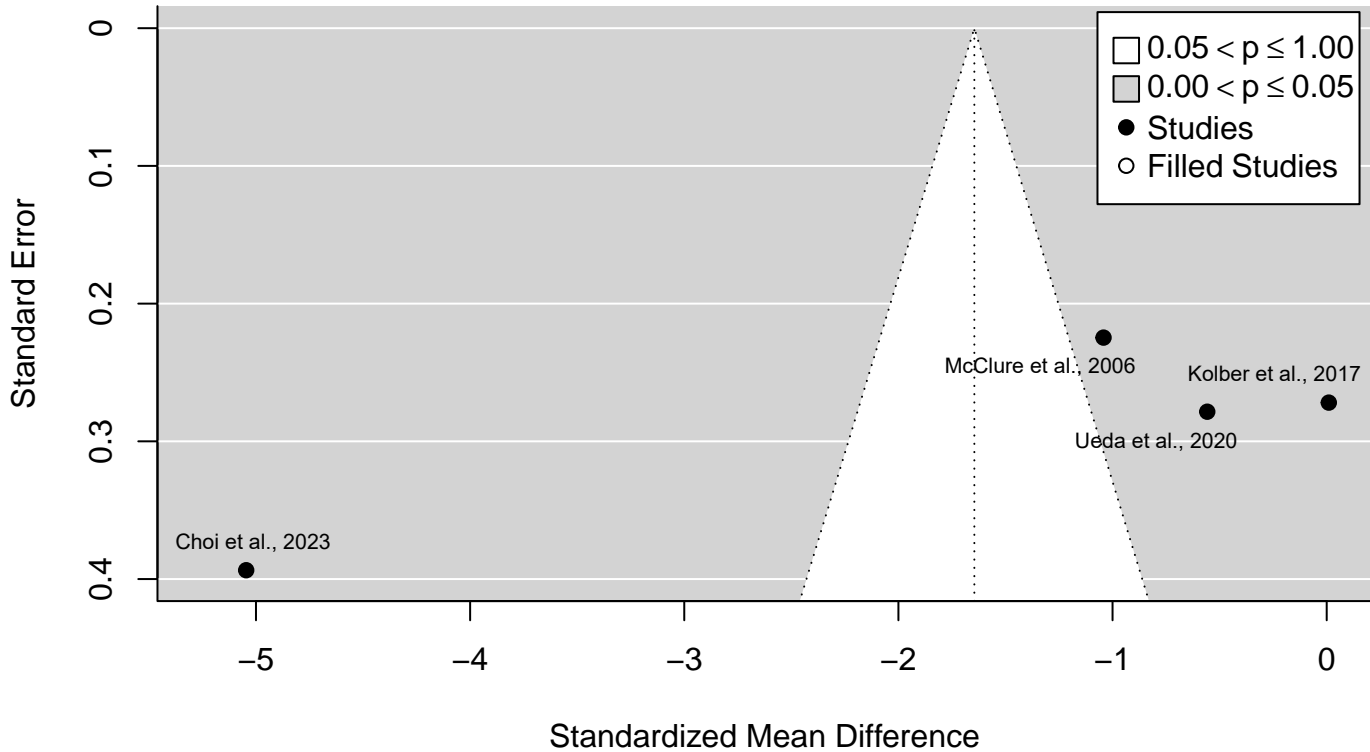

Supplement: S4.pdf [file S4.pdf]
